# Supplementary material for: Community environment, cognitive impairment and dementia in later life: results from the Cognitive Function and Ageing Study
Source: PubMed Central journal article supplement (PMC4621236; doi:10.1093/ageing/afv137), 2015-10-13
Supplement: supp_afv137_afv137supp.pdf [file supp_afv137_afv137supp.pdf]

## **Community environment, cognitive impairment and dementia in later life: results from the Cognitive Function and Ageing Study**

### **Appendix S1: The adjustment for chronic conditions**

To adjust for potential influence of chronic conditions, a sensitivity analysis of including different measures of health status was conducted. The results of Model 2 were adjusted for socio-demographic factors and number of co-morbidity. Instead of using the count variable for co-morbidity, Model 2a included chronic conditions individually (hypertension, diabetes, stroke, heart attack, angina, low blood pressure, hearing/visual impairment and depression) for further adjustment. To address the issue of self-reported information on chronic illnesses, Model 2b included functional impairment (ADL/IADL), which is a strong indicator of decline in physical health caused by various chronic conditions. Although functional impairment might be an outcome of cognitive impairment or dementia, it could be a robust measure of poor health status.

The results of these three models are reported in **Table S1**. The direction and strength of association between community level factors, cognitive impairment and dementia did not change considerably using different types of adjustment for chronic conditions.

**Table S1** The association between community level factors, cognitive impairment and dementia adjusting for socio-demographic factors and chronic conditions

|                              |           | Cognitive impairment (MMSE $\leq$ 25) |                   |                   | Dementia          |                   |                   |
|------------------------------|-----------|---------------------------------------|-------------------|-------------------|-------------------|-------------------|-------------------|
|                              |           | Model 2                               | Model 2a          | Model 2b          | Model 2           | Model 2a          | Model 2b          |
|                              |           | OR (95% CI)                           | OR (95% CI)       | OR (95% CI)       | OR (95% CI)       | OR (95% CI)       | OR (95% CI)       |
| <b>Area deprivation</b>      |           |                                       |                   |                   |                   |                   |                   |
| (Least deprived)             | Q1 (ref.) | 1.00                                  | 1.00              | 1.00              | 1.00              | 1.00              | 1.00              |
|                              | Q2        | 1.21 (0.87, 1.68)                     | 1.19 (0.85, 1.66) | 1.13 (0.80, 1.59) | 1.05 (0.55, 2.00) | 0.97 (0.51, 1.86) | 0.83 (0.44, 1.56) |
|                              | Q3        | 1.03 (0.74, 1.42)                     | 0.99 (0.71, 1.38) | 0.91 (0.65, 1.28) | 1.19 (0.64, 2.22) | 1.05 (0.56, 1.96) | 0.86 (0.46, 1.59) |
| (Most deprived)              | Q4        | 1.16 (0.84, 1.61)                     | 1.11 (0.80, 1.54) | 0.95 (0.68, 1.34) | 1.39 (0.76, 2.56) | 1.16 (0.63, 2.14) | 1.06 (0.58, 1.94) |
|                              | p.        | 0.63                                  | 0.87              | 0.47              | 0.23              | 0.57              | 0.71              |
| <b>Built environment</b>     |           |                                       |                   |                   |                   |                   |                   |
| Land use mix (Lowest)        | Q1 (ref.) | 1.00                                  | 1.00              | 1.00              | 1.00              | 1.00              | 1.00              |
|                              | Q2        | 0.76 (0.55, 1.04)                     | 0.74 (0.54, 1.02) | 0.74 (0.53, 1.02) | 0.60 (0.33, 1.09) | 0.60 (0.33, 1.10) | 0.71 (0.40, 1.26) |
|                              | Q3        | 0.69 (0.51, 0.95)                     | 0.68 (0.49, 0.94) | 0.65 (0.47, 0.90) | 0.68 (0.37, 1.23) | 0.60 (0.33, 1.10) | 0.62 (0.35, 1.10) |
| (Highest)                    | Q4        | 0.86 (0.63, 1.16)                     | 0.86 (0.64, 1.16) | 0.81 (0.59, 1.10) | 0.58 (0.32, 1.03) | 0.56 (0.31, 1.00) | 0.57 (0.33, 0.99) |
|                              | p.        | 0.39                                  | 0.40              | 0.21              | 0.11              | 0.07              | 0.04              |
| Natural environment (Lowest) | Q1 (ref.) | 1.00                                  | 1.00              | 1.00              | 1.00              | 1.00              | 1.00              |
|                              | Q2        | 0.78 (0.57, 1.04)                     | 0.77 (0.57, 1.04) | 0.80 (0.59, 1.10) | 0.96 (0.54, 1.71) | 0.92 (0.52, 1.64) | 0.95 (0.54, 1.66) |
|                              | Q3        | 0.99 (0.73, 1.33)                     | 1.00 (0.74, 1.34) | 1.04 (0.76, 1.41) | 0.95 (0.53, 1.70) | 0.96 (0.54, 1.72) | 1.06 (0.60, 1.88) |
| (Highest)                    | Q4        | 1.28 (0.93, 1.75)                     | 1.31 (0.96, 1.80) | 1.42 (1.03, 1.96) | 1.64 (0.91, 2.97) | 1.75 (0.97, 3.17) | 1.77 (1.02, 3.08) |
|                              | p.        | 0.08                                  | 0.06              | 0.02              | 0.15              | 0.10              | 0.05              |
| <b>Social environment</b>    |           |                                       |                   |                   |                   |                   |                   |
| Crime (Least)                | Q1 (ref.) | 1.00                                  | 1.00              | 1.00              | 1.00              | 1.00              | 1.00              |
|                              | Q2        | 0.94 (0.68, 1.30)                     | 0.93 (0.67, 1.29) | 0.92 (0.66, 1.28) | 1.34 (0.71, 2.54) | 1.36 (0.72, 2.58) | 1.47 (0.78, 2.79) |
|                              | Q3        | 0.97 (0.71, 1.34)                     | 0.94 (0.68, 1.30) | 0.94 (0.67, 1.30) | 1.55 (0.83, 2.89) | 1.48 (0.79, 2.79) | 1.67 (0.88, 3.18) |
| (Most)                       | Q4        | 0.96 (0.70, 1.31)                     | 0.94 (0.69, 1.29) | 0.89 (0.64, 1.23) | 1.15 (0.62, 2.12) | 1.04 (0.56, 1.94) | 1.25 (0.67, 2.33) |
|                              | p.        | 0.88                                  | 0.77              | 0.51              | 0.70              | 0.99              | 0.57              |

**Model 2:** adjusted for age, gender, education, social class and number of chronic illnesses

**Model 2a:** adjusted for age, gender, education, social class, hypertension, diabetes, stroke, heart attack, angina, low blood pressure, hearing/visual impairment and depression

**Model 2b:** adjusted for age, gender, education, social class and functional impairment (ADL/IADL)

p.: p-value of test for trend
